# Supplementary material for: Exciton interactions in cyanine dye–hyaluronic acid (HA) complex: reversible and biphasic molecular switching of chromophores induced by random coil-to-double-helix phase transition of HA
Source: Royal Society of Chemistry journal article supplement (doi:10.1039/b408032g), 2004-01-01
Supplement: b408032g.pdf [file b408032g.pdf]

## Supplementary Information

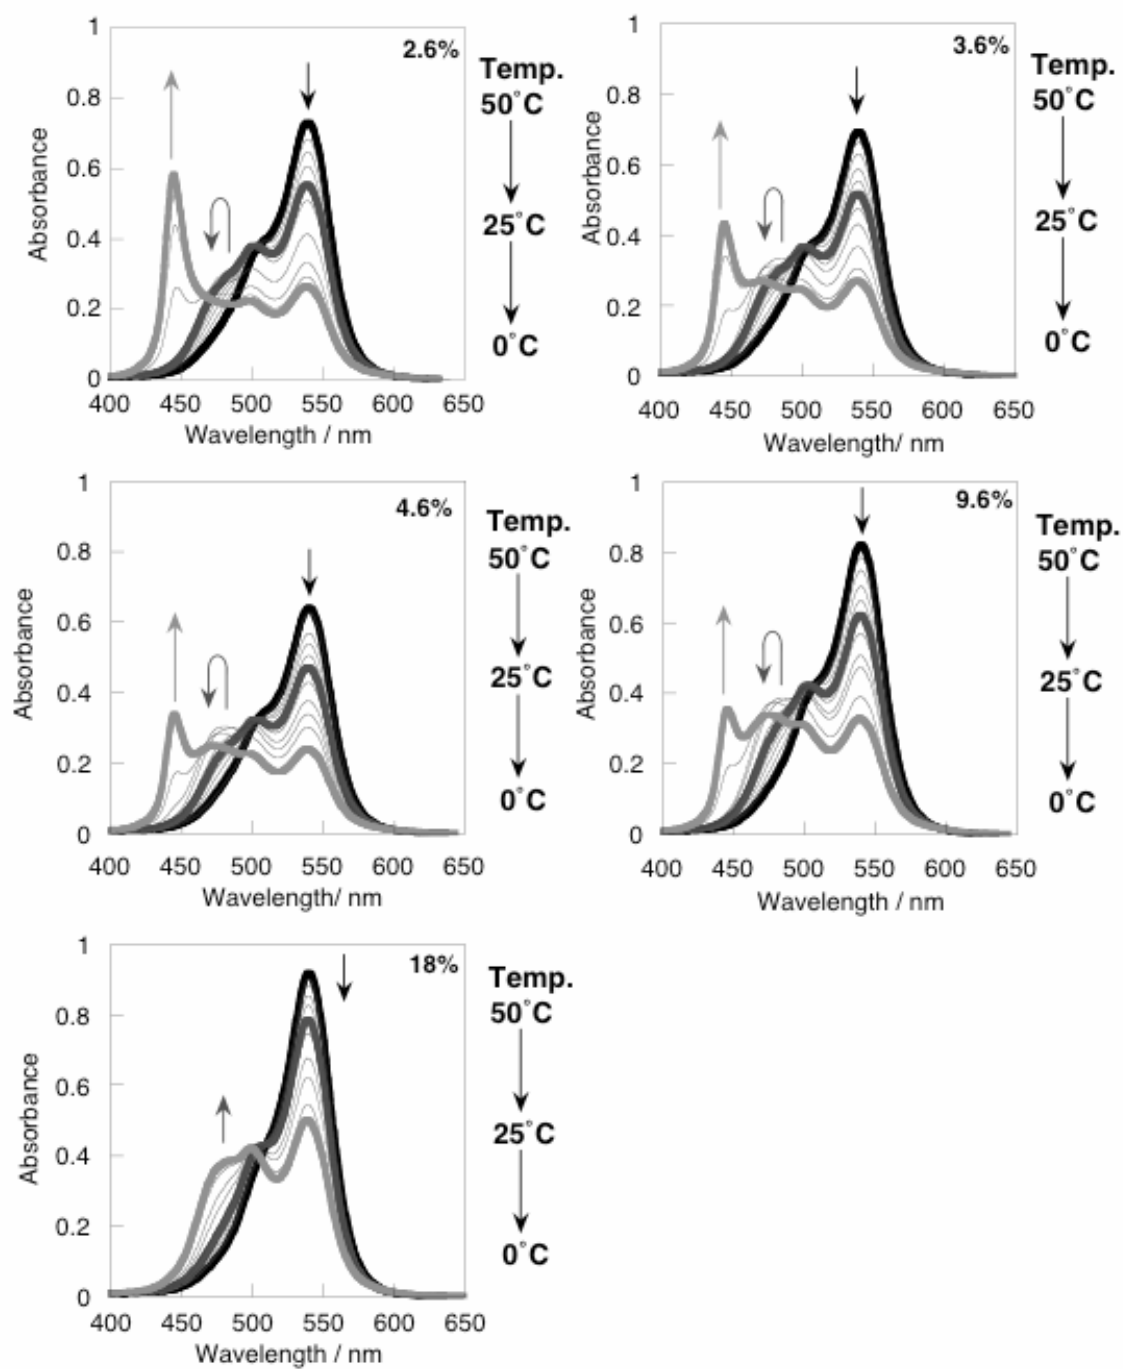

Fig. S1 Visible spectra of the mixture of NK-77 (10  $\mu\text{M}$ ) and HA (20 unit- $\mu\text{M}$ ) in 2.6—18 vol% MeOH-H<sub>2</sub>O.

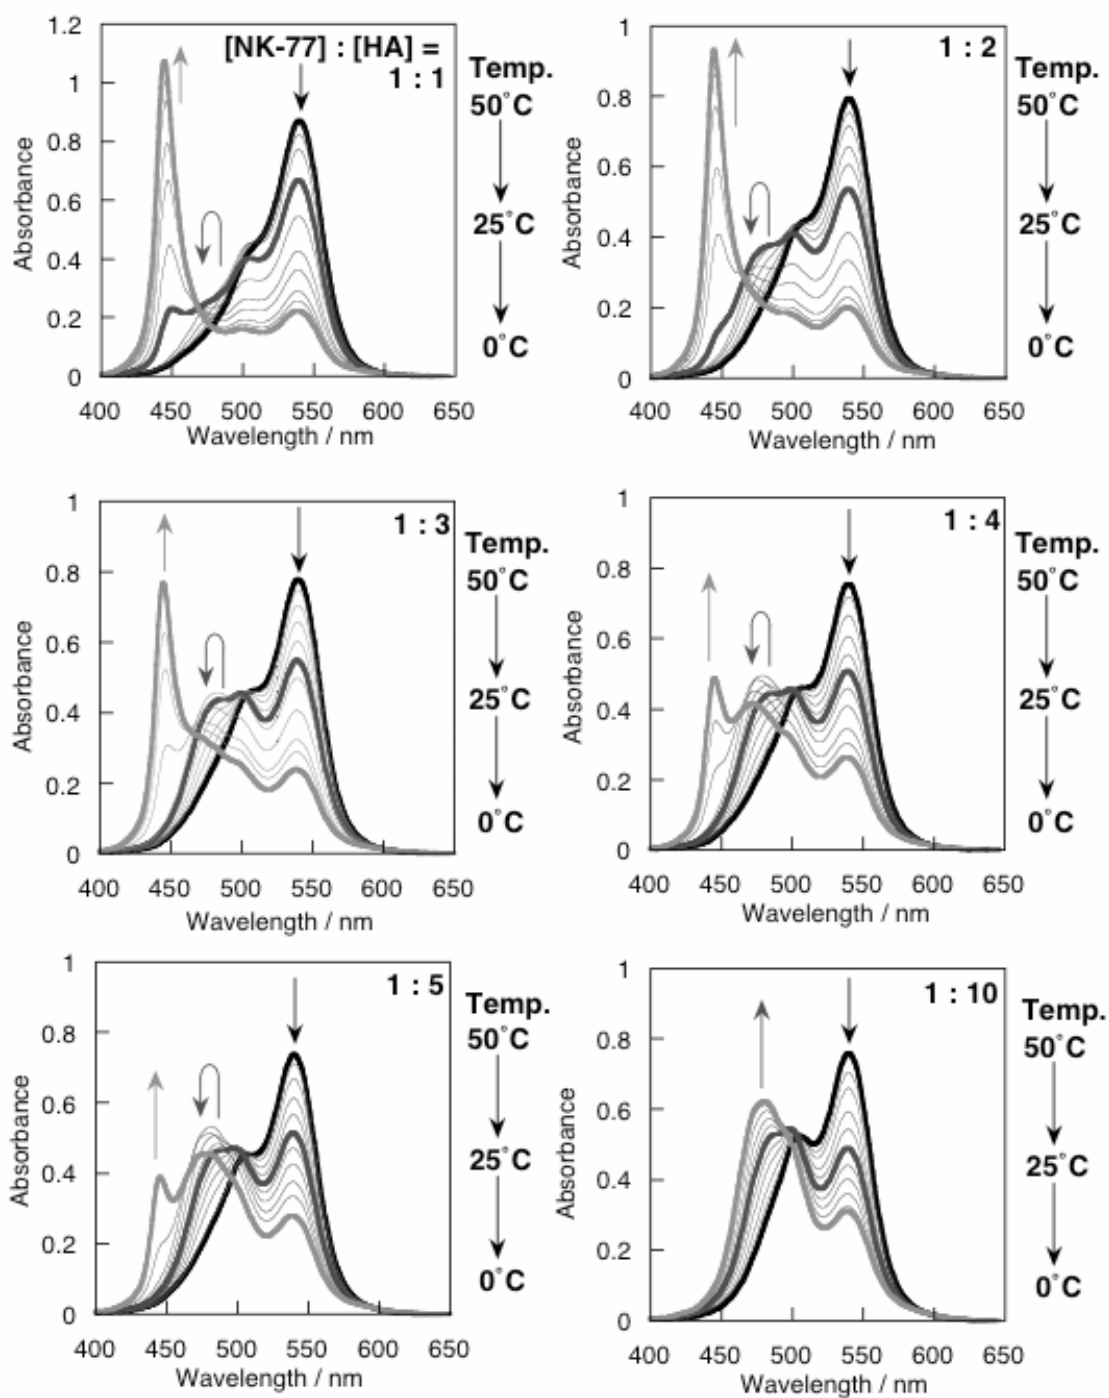

Fig. S2 Visible spectral changes caused by the addition of HA (10-100 unit- $\mu\text{M}$ ) to a solution of NK-77 (10  $\mu\text{M}$ ) in 2.4 vol% MeOH-H<sub>2</sub>O.

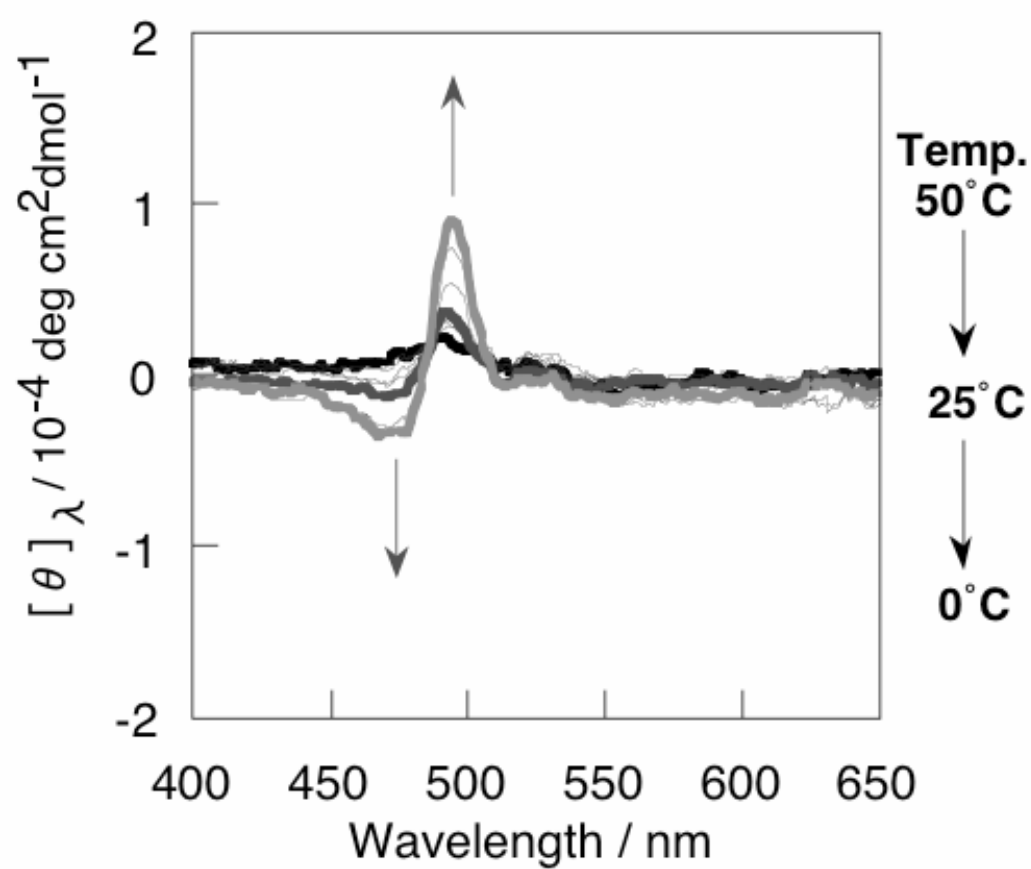

**Fig. S3** CD spectra of the mixture of HA (100 unit- $\mu$ M) and NK-77 (10  $\mu$ M) in 2.4 vol% MeOH-H<sub>2</sub>O.

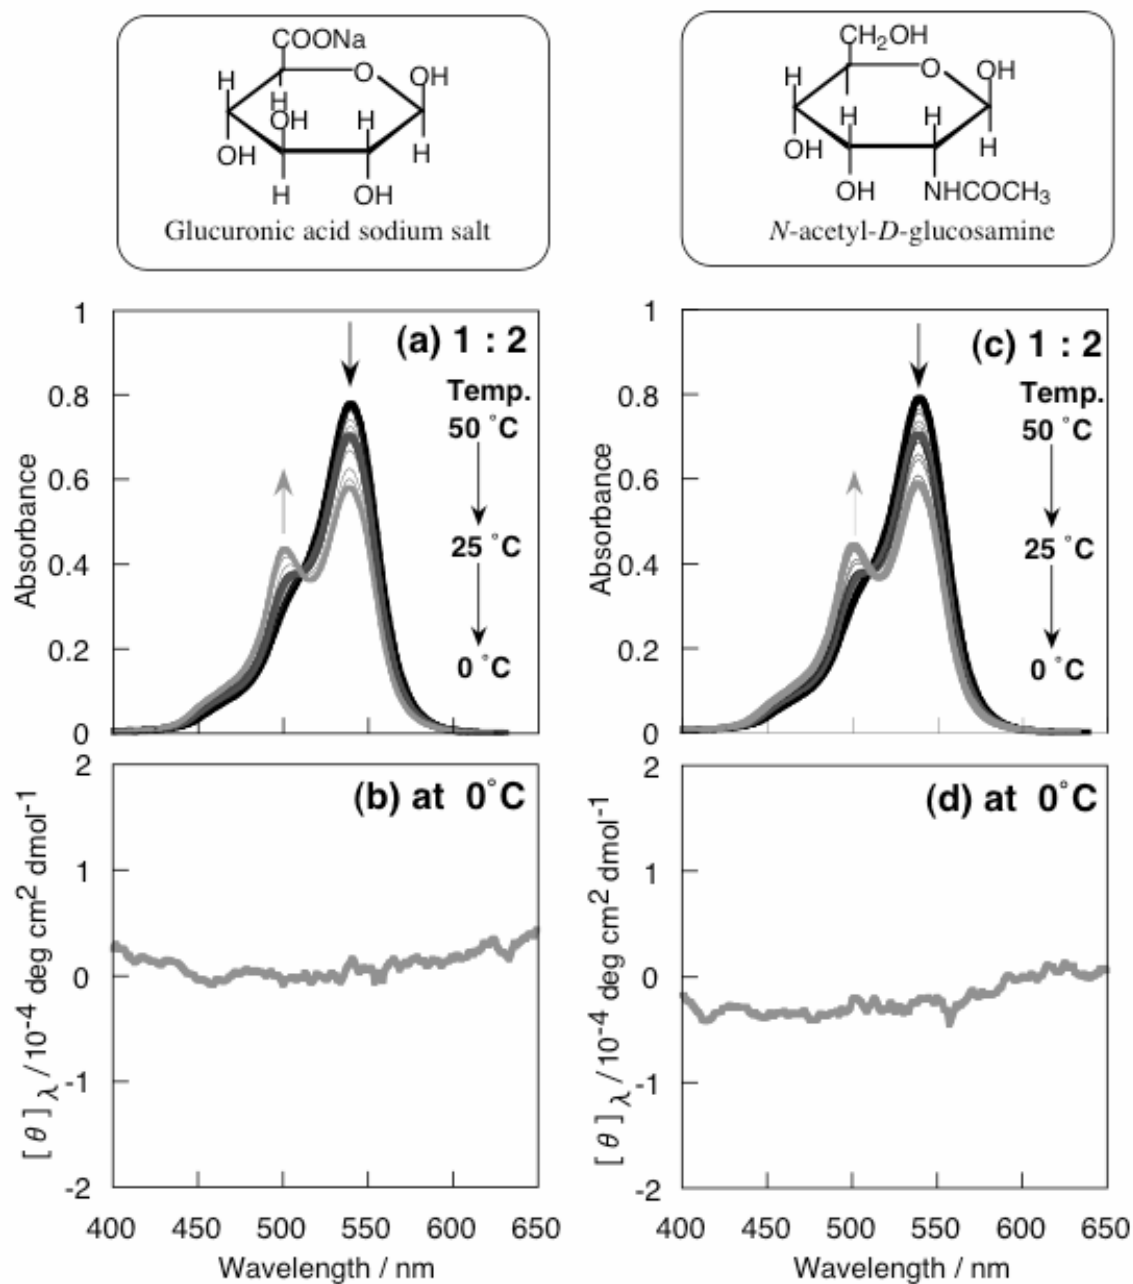

**Fig. S4** Visible and CD spectra of the mixture of NK-77 (10 μM) and 20 μM of D-glucuronic acid, and/or *N*-acetyl-*D*-glucosamine in 2.5 vol% MeOH-H<sub>2</sub>O.

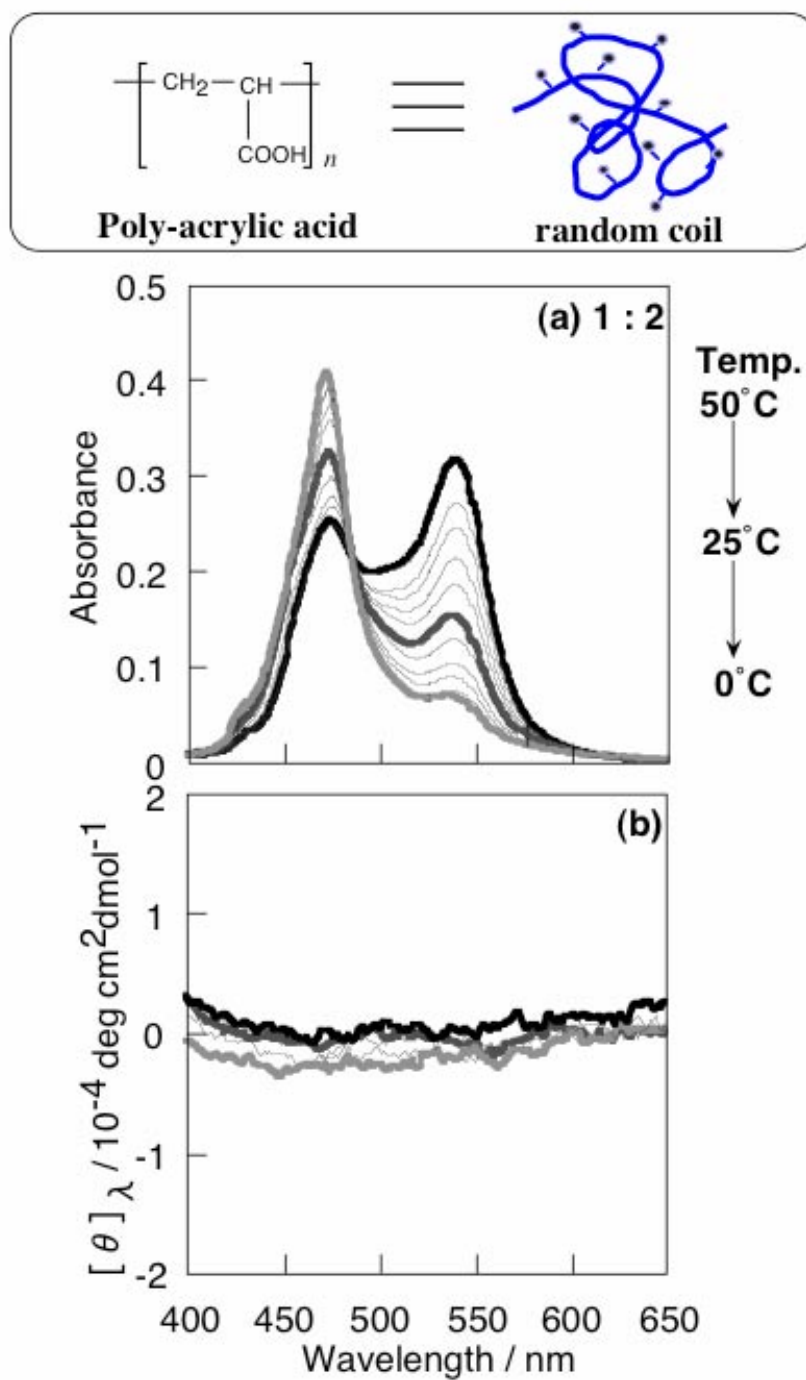

**Fig. S5** Visible and CD spectra of the mixture of NK-77 (10  $\mu\text{M}$ ) and poly(acrylic acid) (20 unit- $\mu\text{M}$ ) in 2.5 vol% MeOH- $\text{H}_2\text{O}$ .

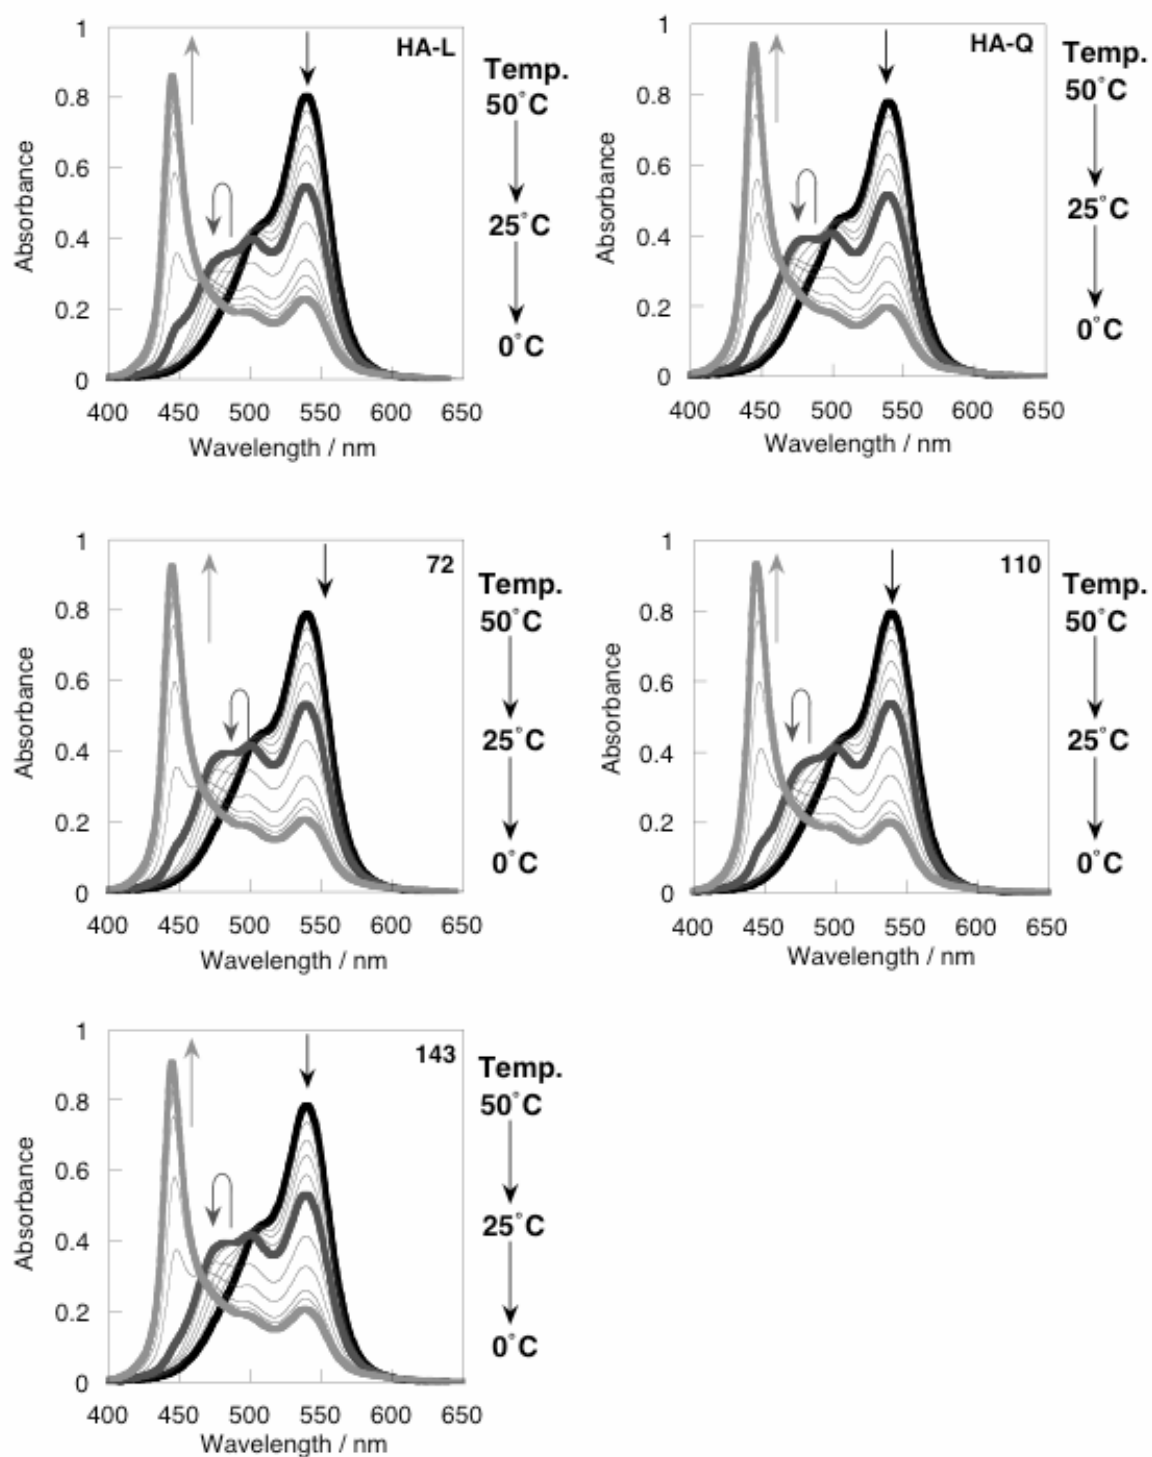

Fig. S6 Visible spectra of the mixture of NK-77 (10  $\mu\text{M}$ ) and various HAs (20  $\mu\text{M}$ ) in 2.4 vol% MeOH-H<sub>2</sub>O.
